# Supplementary material for: Effect of Lopinavir/Ritonavir Treatment On COVID-2019 Transmissibility: A Possible Option To Reduce Isolation Time
Source: Research Square preprint supplement (doi:10.21203/rs.3.rs-516757/v2), 2021-07-07
Supplement: Supplementary file 1 [file d4076608358242966e90ea9d.docx]

**Figure S1:**


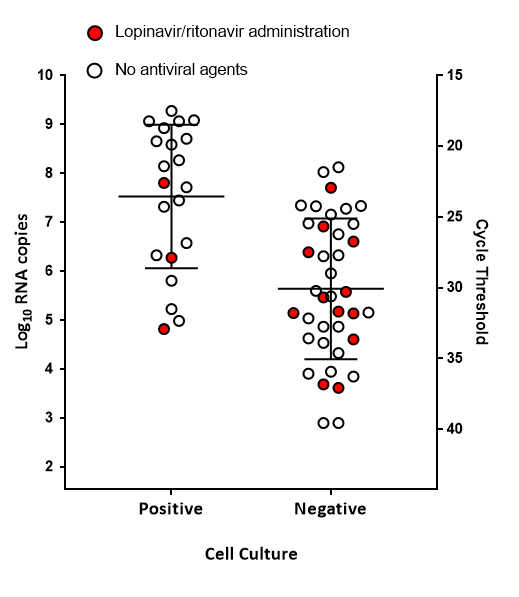


The SARS-CoV-2 cell culture tested specimens are plotted by log10 RNA copies/mL (y-axis) and are stratified by patients samples (n=15) who were administered with Lopinavir/ritonavir (red data points) with patients samples (n=45) who did not receive any antiviral agents (open circles). The lines indicates mean with standard deviation.
