# Supplementary material for: Effect of Lopinavir/Ritonavir Treatment On COVID-2019 Transmissibility: A Possible Option To Reduce Isolation Time
Source: Research Square preprint supplement (doi:10.21203/rs.3.rs-516757/v2), 2021-07-07
Supplement: Supplementary file 2 [file fda7fc837acc338704938811.docx]

Figure S 2:


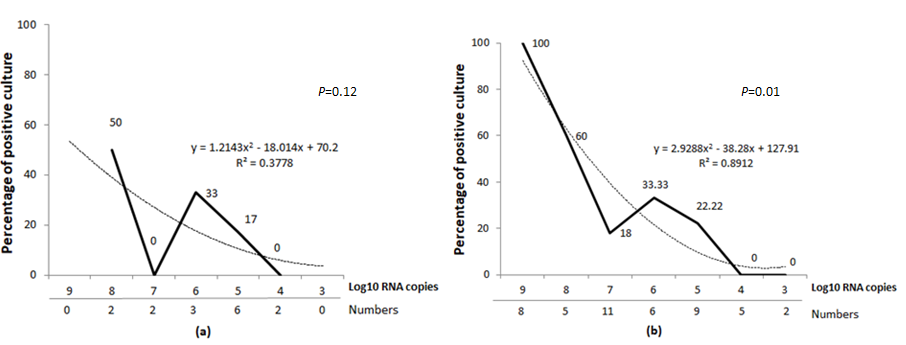


The numbers below the dash line on x-axis indicates total number of samples cultured. The dash curve indicates polynomial regression curve.

The direction and strength of correlation coefficient value (*r*) were characterized as follows: -1 as perfectly negative; -0.8, -0.5, -0.2 as strongly, moderately and weakly negative; 0 as no association; 0.2, 0.5, 0.8 as weakly, moderately and strongly positive and 1 as perfectly positive
